# Supplementary material for: Mitochondria-targeted esculetin alleviates mitochondrial dysfunction by AMPK-mediated nitric oxide and SIRT3 regulation in endothelial cells: potential implications in atherosclerosis
Source: PubMed Central journal article supplement (PMC4827087; doi:10.1038/srep24108), 2016-04-11
Supplement: srep24108-s1.pdf [file srep24108-s1.pdf]

# **Mitochondria-targeted esculetin alleviates mitochondrial dysfunction by AMPK-mediated nitric oxide and SIRT3 regulation in endothelial cells: potential implications in atherosclerosis**

**Santosh Karnewar<sup>1,2</sup>, Sathish Babu Vasamsetti<sup>1,2</sup>, Raja Gopoju<sup>1,2</sup>, Anantha Koteswararao Kanugula<sup>1</sup>, Sai Krishna Ganji<sup>3</sup>, Sripadi Prabhakar<sup>3</sup>, Nandini Rangaraj<sup>4</sup>, Nitin Tupperwar<sup>4</sup>, Jerald Mahesh Kumar<sup>4\*</sup> and Srigiridhar Kotamraju<sup>1,2\*</sup>**

<sup>1</sup>Centre for Chemical Biology, CSIR-Indian Institute of Chemical Technology, Uppal Road, Hyderabad-500007, India. <sup>2</sup>Academy of Scientific and Innovative Research, Training and Development Complex, Chennai, India. <sup>3</sup>National Centre for Mass Spectrometry, Indian Institute of Chemical Technology, Hyderabad-500007, India. <sup>4</sup>CSIR-Centre for Cellular and Molecular Biology, Uppal Road, Hyderabad-500007, India.

## **Correspondence:**

Dr. Srigiridhar Kotamraju, Centre for Chemical Biology, CSIR-Indian Institute of Chemical Technology, Hyderabad-500007, India. +91-40-27191867; Email: [giridhar@iict.res.in](mailto:giridhar@iict.res.in)

Dr. Jerald Mahesh Kumar, CSIR-Centre for Cellular and Molecular Biology, Uppal Road, Hyderabad-500007, India. +91-40-27192872; Email: [mahesh73@ccmb.res.in](mailto:mahesh73@ccmb.res.in)

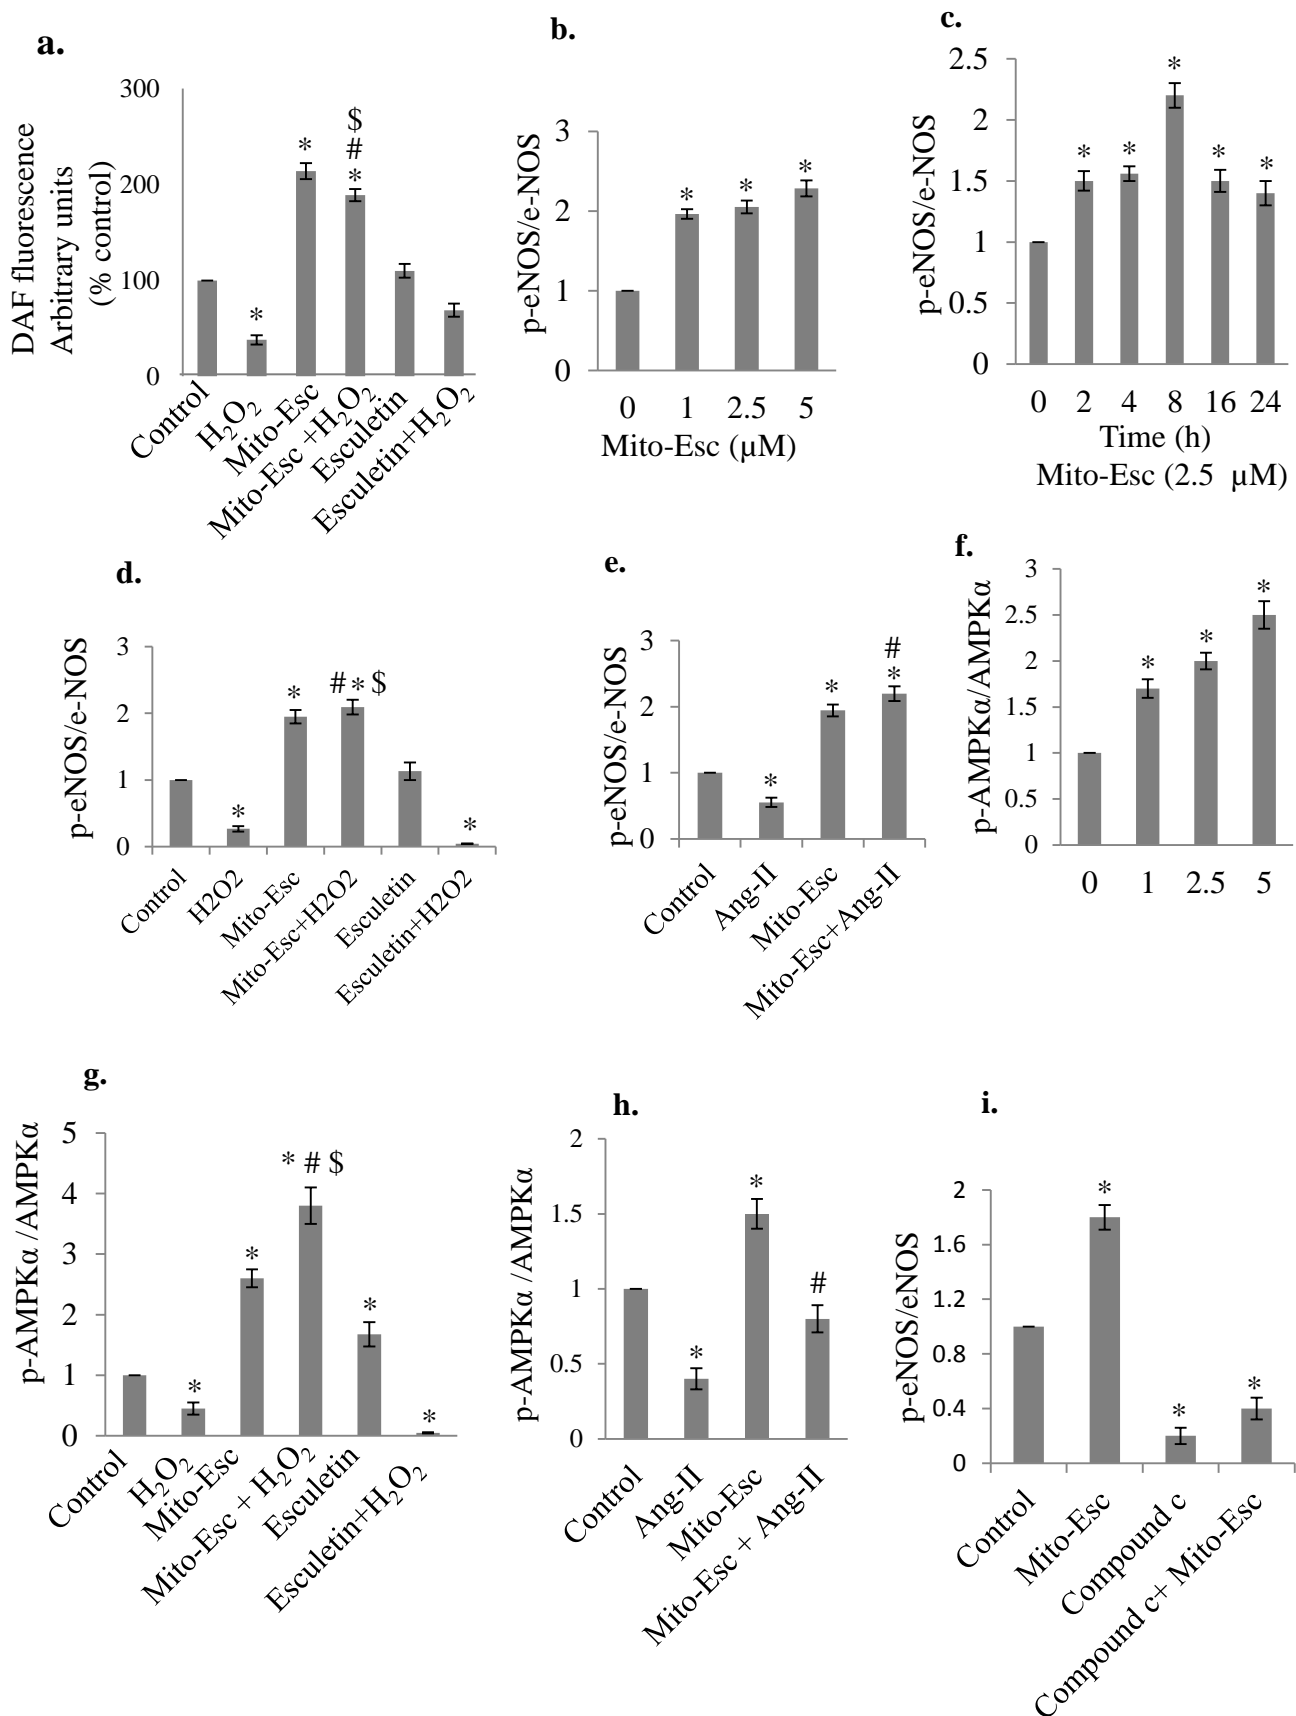

**Fig. S1.** Densitometric analysis of the DAF-2DA and Western blots presented in Fig.4.

\*, significantly different ( $p < 0.05$ ) compared to control group. #, significantly different ( $p < 0.05$ ) compared to Ang-II/H<sub>2</sub>O<sub>2</sub> treated group. \$, significantly different compared to Esc + H<sub>2</sub>O<sub>2</sub> treated group.

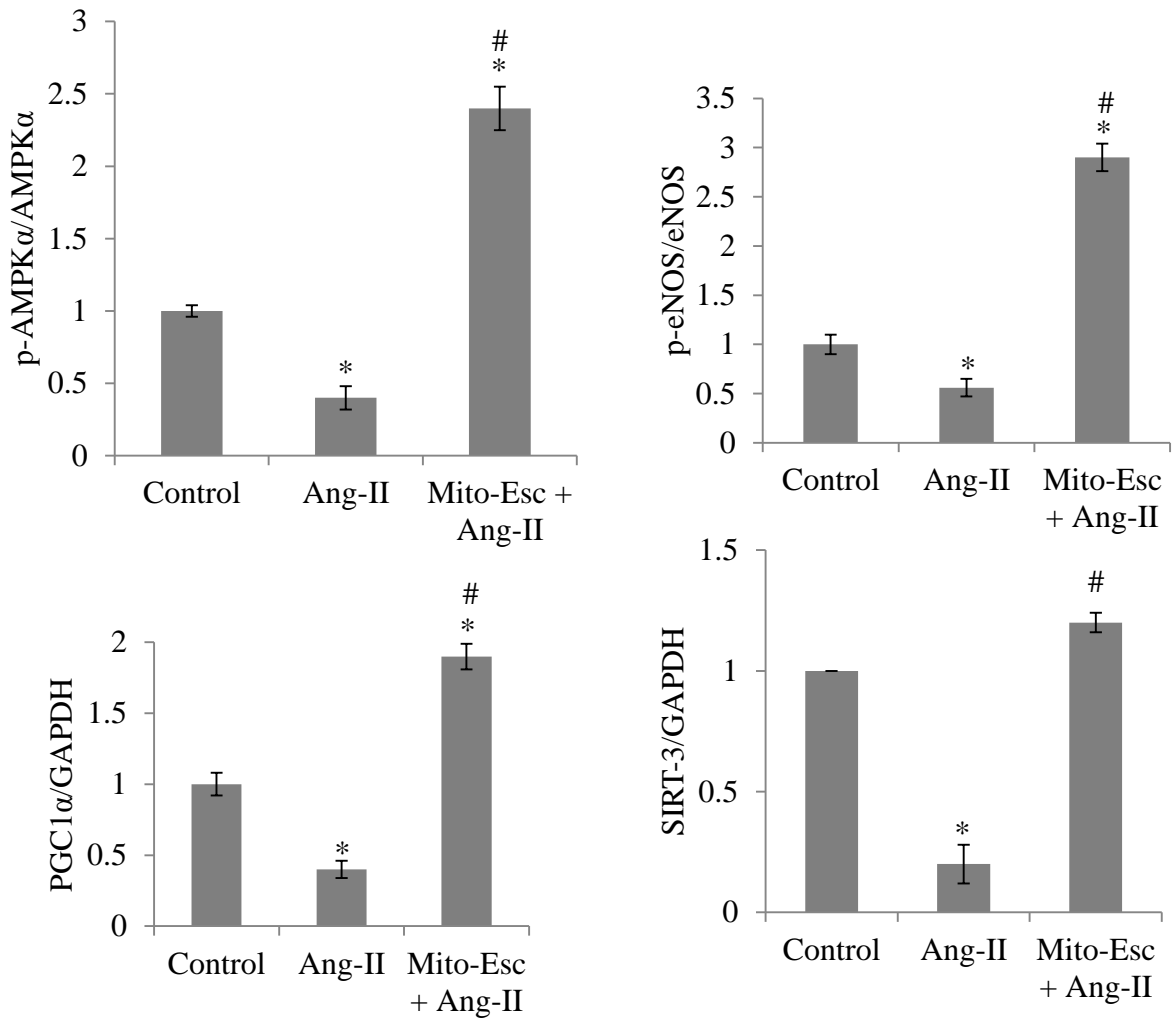

**Fig. S2.** Densitometric analysis of the Western blots presented in Fig.10b

\*, significantly different ( $p < 0.05$ ) compared to control group. #, significantly different ( $p < 0.05$ ) compared to Ang-II treated group.

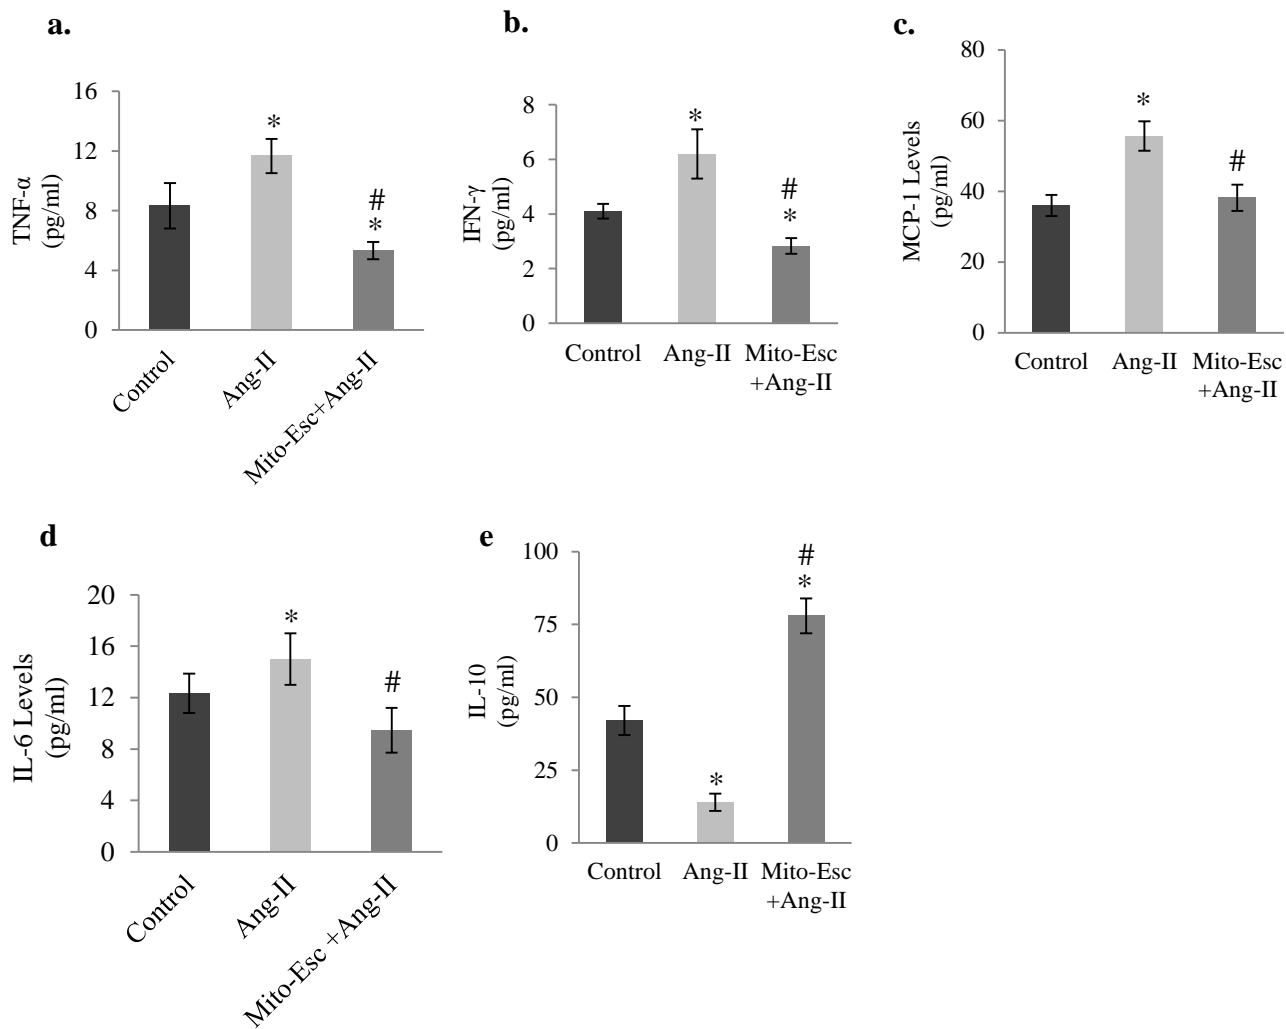

**Fig.S3. Mito-Esc administration reduces Ang-II-induced proinflammatory cytokines production:** (a-e) Serum cytokines levels were measured using BD multiplex assay kits according to Manufacturer's instructions. \*, significantly different ( $p < 0.05$ ) compared to control group. #, significantly different ( $p < 0.05$ ) compared to Ang-II treated group.

**Table S1. Alterations in lipid profile.**

| condition         | Triglycerides (mg/dL) | LDL (mg/dL) | HDL (mg/dL) | VLDL (mg/dL) | Total Cholesterol (mg/dL) |
|-------------------|-----------------------|-------------|-------------|--------------|---------------------------|
| Control           | 175±6                 | 165±15      | 23±1.5      | 35±0.7       | 364±14                    |
| Ang-II            | 234±21*               | 423±29*     | 2.2±1.2*    | 47±2.2*      | 656±34*                   |
| Ang-II+ Mito-Esc  | 150±4#                | 218±21#     | 45±0.4#     | 30±0.4#      | 414±8#                    |
| Ang-II+ Esculetin | 239±31*               | 409±91*     | 4.2±0.9*    | 49±3.1*      | 601±18*                   |

\*, significantly different ( $p < 0.05$ ) compared to untreated conditions. #, significantly different ( $p < 0.05$ ) compared to Ang-II treated group.
